# Supplementary material for: Bioproduction of Eriodictyol By Escherichia Coli Engineered Co-Culture
Source: Research Square preprint supplement (doi:10.21203/rs.3.rs-1122328/v1), 2021-12-06
Supplement: Supplementary file 1 [file 158c7060b64518a538699d29.docx]

☑ All authors have read the submitted version of the paper AND have approved its submission.

☑ Please make sure that you **deposit strains and sequence data** in a recognized data bank

☑ All authors have double checked their affiliation (with precise location), especially if an email address is used that is not provided by the institution.

☑ All text, includingAbstract, tables, references, footnotes and figure legends, is double-spaced printed

(NOT 1 1/2 spacing)and uses a full-page width (15 cm) on the equivalent of an A4 sheet**.**

☑ The title should be informative and clear. Do not use unspecified, nonstandard abbreviations in the title. Avoid ambiguous expressions such as “The effect of…”. Please ensure that the biological origin of the system under investigation is given in the title.

☑ Key words or phrases (but not abbreviations) are given in **alphabetical order** after the Abstract. Up to

7 can be used.

☑ Do not submit abstracts divided in sections, containing non-standard abbreviations or citing references.

☑ Sub-headings in all sections should be clearly indicated but are **NOT** numbered.

☑ Do not combine Results and Discussion.

☑ Tables and figures are placed after the list of references. (Tables before figures.)

☑ Legends to figures are grouped together on a separate sheet(s) which precedes the figures themselves.

☑ Position for each table and figure should be indicated in the text by a marginal note or a clear note between paragraphs in the text.
